# Supplementary material for: Determinants of self-reported functional status (EPIC-26) in prostate cancer patients prior to treatment
Source: World J Urol. 2020 Feb 10;39(1):27–36. doi: 10.1007/s00345-020-03097-z (PMC7858203; doi:10.1007/s00345-020-03097-z)
Supplement: Supplementary file 3 — Supplementary file3 (DOCX 26 kb) [file 345_2020_3097_MOESM3_ESM.docx]

Determinants of self-reported functional status (EPIC-26) in prostate cancer patients prior to treatment

**Rebecca Hein**1,* · **Sebastian Dieng**2 · **Alisa Oesterle**2 · **Günter Feick3 · Günther Carl4 · Andreas Hinkel5 · Thomas Steiner6 · Björn Theodor Kaftan7 · Frank Kunath8 · Boris Hadaschik9 · Simba-Joshua Oostdam10 · Rein Jüri Palisaar11 · Mateusz Koralewski12 · Burkhard Beyer13 · Björn Haben14 ·** **Tsaur, Igor** 15 · **Simone Wesselmann**16 · **Christoph Kowalski**15

1 Institute of Medical Statistics and Computational Biology, Medical Faculty, University of Cologne, Germany; 2OnkoZert, Neu-Ulm, Germany; 3 Federal Association of German Prostate Cancer Patient Support Groups, Bonn, Germany; 4 Help for Prostate Cancer Patients (Förderverein Hilfe bei Prostatakrebs e.V., FHbP), Tornesch, Germany; 5 Franziskus Hospital, Bielefeld; 6 Helios Klinikum Erfurt; 7 Städtisches Klinikum Lüneburg; 8 Department of Urology and Pediatric Urology, University Hospital Erlangen, FAU Erlangen-Nürnberg; 9 Klinik und Poliklinik für Urologie,Kinderurologie und Uroonkologie, Universitätsklinikum Essen (AöR); 10 Vinzenz-Krankenhaus Hannover; 11 Urologische Klinik, Marien Hospital Herne; 12 Urologie, Krankenhaus derBarmherzigen Brüder Trier; 13 Martini-Klinik Prostate Cancer Center Hamburg; 14 St. Marien Hospital Ahaus; 15 Klinik und Poliklinik für Urologie und Kinderurologie, Universitätsmedizin der Johannes Gutenberg-Universität Mainz; 16 German Cancer Society, Berlin, Germany

Online Resource 3: Results of linear multilevel analyses for pretherapeutic self-reported functional status (model 2)

|  | Urinary incontinence (2699 patients, 43 centers) | | Urinary irritative/obstructive (2632 patients, 43 centers) | | Bowel (2636 patients, 43 centers) | Sexual (2749 patients, 43 centers) | Hormonal (2698 patients, 43 centers) |
| --- | --- | --- | --- | --- | --- | --- | --- |
|  | Estimate (95% CI); p-value | | Estimate (95% CI); p-value | | Estimate (95% CI); p-value | Estimate (95% CI); p-value | Estimate (95% CI); p-value |
| (Intercept) | 103.6 (98.41-108.78) | | 94.67 (88.93-100.42) | | 96.9 (93.49-100.32) | 148.6 (139.08-158.12) | 75.12 (70.02-80.22) |
| **Patient characteristics** | |  | |
| *Sociodemographic information* | |  | |
| Age | **-0.19 (-0.26--0.11);**  **<0.001*** | | **-0.13 (-0.21--0.04);**  **0.003*** | | 0 (-0.05-0.05);  0.892 | **-1.39 (-1.53--1.25);**  **<0.001*** | **0.24 (0.17-0.32);**  **<0.001*** |
| Nationality |  | |  | |  |  |  |
| German | Reference | | Reference | | Reference | Reference | Reference |
| Other | -2.35 (-5.44-0.75);  0.138 | | -2.94 (-6.36-0.47);  0.091 | | 0.04 (-1.99-2.07);  0.970 | 0.5 (-5.24-6.25);  0.864 | 0.58 (-2.43-3.59);  0.704 |
| Insurance |  | |  | |  |  |  |
| Statutory | Reference | | Reference | | Reference | Reference | Reference |
| Private | 1.11 (-0.32-2.53);  0.128 | | 1.34 (-0.24-2.92);  0.096 | | 0.69 (-0.25-1.63);  0.151 | 2.46 (-0.16-5.08);  0.065 | 1.26 (-0.14-2.66);  0.077 |
| School-leaving qualification |  | |  | |  |  |  |
| Lower secondary school | Reference | | Reference | | Reference | Reference | Reference |
| Intermediate secondary school | 1.35 (-0.11-2.81);  0.070 | | 0.55 (-1.07-2.18);  0.504 | | 0.34 (-0.64-1.31);  0.499 | **3.23 (0.57-5.89);**  **0.017*** | **2.06 (0.62-3.5);**  **0.005*** |
| FHSRa | 1.05 (-0.78-2.89);  0.261 | | -0.36 (-2.39-1.67);  0.727 | | -0.76 (-2-0.47);  0.224 | **6.37 (3-9.75);**  **<0.001*** | 0.01 (-1.81-1.84);  0.988 |
| University entrance certificate | 0.72 (-0.89-2.33);  0.378 | | 0.03 (-1.76-1.81);  0.977 | | 0.21 (-0.86-1.28);  0.699 | **8.23 (5.27-11.19);**  **<0.001*** | **2.06 (0.48-3.64);**  **0.011*** |
| Other | 0.81 (-3.69-5.31);  0.725 | | -2.29 (-7.26-2.69);  0.367 | | 0.97 (-1.94-3.88);  0.514 | -0.53 (-8.76-7.7);  0.900 | 1.83 (-2.57-6.23);  0.415 |
| None | -0.58 (-7.4-6.23);  0.867 | | **-10.67 (-18.12--3.22);**  **0.005*** | | -4.58 (-8.87--0.29);  0.036* | -8.06 (-20.11-3.98);  0.189 | 0.90 (-5.69-7.5);  0.788 |
| *Disease information* | |  | |
| Comorbidities |  | |  | |  |  |  |
| 0 | Reference | | Reference | | Reference | Reference | Reference |
| 1 | 0.34 (-1.1-1.77);  0.645 | | 0.61 (-1-2.23);  0.458 | | -0.25 (-1.18-0.69);  0.602 | **-4.84 (-7.48--2.21);**  **<0.001*** | **-2.1 (-3.5--0.7);**  **0.003*** |
| ≥ 2 | 1.3 (-0.91-3.52);  0.249 | | -1.53 (-4.01-0.95);  0.226 | | **-1.44 (-2.88-0.01);**  **0.052*** | **-8.5 (-12.59--4.4);**  **<0.001*** | **-4.26 (-6.43--2.09);**  **<0.001*** |
| Risk classb |  | |  | |  |  |  |
| High, localized | -0.62 (-2.32-1.07);  0.469 | | **-2.13 (-4.01--0.26);**  **0.026*** | | **-1.4 (-2.53--0.27);**  **0.016*** | -0.94 (-4.05-2.17);  0.553 | **-1.87 (-3.54--0.19);**  **0.029*** |
| Intermediate, localized | 0.44 (-1.15-2.04);  0.587 | | -0.12 (-1.9-1.66);  0.895 | | -0.82 (-1.89-0.25);  0.133 | 1.97 (-0.97-4.91);  0.188 | -0.31 (-1.9-1.27);  0.700 |
| Low, localized | Reference | | Reference | | Reference | Reference | Reference |
| Locally advanced | 1.29 (-1.62-4.21);  0.384 | | **-3.46 (-6.67--0.24);**  **0.035*** | | -1.28 (-3.2-0.64);  0.192 | -1.13 (-6.41-4.14);  0.673 | -1.32 (-4.21-1.58);  0.374 |
| Advanced (N1) | -2.18 (-7.53-3.17);  0.424 | | **-13.55 (-19.5--7.6);**  **<0.001*** | | **-5.35 (-8.95--1.76);**  **0.003*** | -8.27 (-18.19-1.65);  0.102 | -1.38 (-6.52-3.76);  0.599 |
|  | |  | |
| ICC (model 1) | 0.007;  0.180 | | 0.007;  0.185 | | <0.001;  0.773 | 0.007;  0.163 | 0.007;  0.187 |
| ICC (model 2) | 0.003;  0.336 | | 0.007;  0.198 | | <0.001;  0.964 | 0.002;  0.412 | 0.001;  0.531 |

Note: (1) Multilevel model 2 accounts for the clustering of patients (level 1) in Prostate Cancer Centers (level 2) with a random intercept. Fixed effects for sociodemographic predictors, information on disease and treatment allocation are included. (2) Patient numbers vary between analyses of different scores due to the different number of missing values for the respective scores. (3) Results regarding the missing categories for categorical variables are not presented in this table.

a FHSR: entrance certificate for a higher technical college/university of applied science

b Risk class according to d’Amico (D'Amico et al., 1998)

*P < 0.05
